# Supplementary material
Source: PubMed Central journal article supplement (PMC3119337)
Supplement: NIHMS246798-supplement-01.pdf [file NIHMS246798-supplement-01.pdf]

**Supplementary Table S1.*****prdm1a* target genes identified in both  
microarray analysis and as direct targets through  
ChIP****Name****Gene function****Downregulated Genes**

aldehyde dehydrogenase 3 family, member D1      cellular aldehyde metabolic process

annexin A2a      calcium ion binding

Cryptochrome DASH      FAD binding

epb41l5 - erythrocyte membrane protein band 4.1  
like 5      cytoskeletal protein binding

glutamate -cysteine ligase, modifier subunit      ligase activity

integrin alpha 5      receptor, protein (ECM) binding

zN-Myc protein      DNA binding

microtubule associated protein, RP/EB family,  
member 1      microtubule binding

nuclear VCP-like      ATP binding

platelet activating factor acetylhydrolase, isoform  
1b      hydrolase activity

Rho GTPase activating protein 12      protein binding/signal transduction

sec23 homolog b      protein binding/cartilage development

signal recognition particle 68      ER protein export pathway

solute carrier family 43, member 1      amino acid transport

TAF12 RNA polymerase II, TATA box      DNA Binding, transcription initiation

|                                                           |                                                  |
|-----------------------------------------------------------|--------------------------------------------------|
| binding(TBP)-a                                            |                                                  |
| TBC1 domain family, member 23                             | Rab GTPase activator activity                    |
| tumor necrosis factor, alpha-induced protein 8-like<br>3  | unknown                                          |
| visual system homeobox 1                                  | DNA binding                                      |
| SVOP-like                                                 | transport                                        |
| zgc:55661                                                 | cysteine-type peptidase activity                 |
| zgc:55843                                                 | unknown                                          |
| zgc: 64098                                                | unknown                                          |
| zgc: 66298                                                | unknown                                          |
| zgc: 77817                                                | unknown                                          |
|                                                           |                                                  |
| Upregulated Genes                                         |                                                  |
| actin, alpha 1, skeletal muscle                           | ATP binding/protein binding                      |
| cyclin G2                                                 | cell cycle control                               |
| myosin, heavy polypeptide 2, fast muscle cell<br>specific | ATP binding/ motor protein                       |
| myosin, light polypeptide 2, skeletal muscle              | calcium ion binding                              |
| metaxin 1b                                                | mitochondrial protein import                     |
| troponin T3a, skeletal, fast                              | interacts with tropomyosin/muscle<br>contraction |
| tryptophan hydroxylase 1                                  | aromatic amino acid family metabolic<br>process  |
| zgc: 92129                                                | unknown                                          |

\*Chip-on-chip analysis determined direct Prdm1a binding previously identified 381 putative Prdm1a targets involved in muscle development (von Hofsten *et al.*, 2008). We have identified 8 genes that are significantly upregulated and 24 significantly downregulated genes in our microarray analysis of whole embryos at 25 hpf that were also identified in the Chip-on-Chip analysis performed by von Hofstren and colleagues.
